# Supplementary material for: Unlocking new possibility of Fe3O4@C@Ag nanostructures as an advanced SERS substrate for ultrasensitive detection of low-cross-section urea biomolecules
Source: Royal Society of Chemistry journal article supplement (doi:10.1039/d4ra07487d), 2025-01-01
Supplement: d4ra07487d1.pdf [file d4ra07487d1.pdf]

## Supporting Information

# Unlocking New Possibility of Fe<sub>3</sub>O<sub>4</sub>@C@Ag Nanostructures as an Advanced SERS Substrate for Ultrasensitive Detection of Low-Cross-Section Urea Biomolecules

Quan-Doan Mai<sup>a,\*</sup>,<sup>1</sup>, Dang Thi Hanh Trang<sup>a,1</sup>, Dong Thi Linh<sup>a</sup>, Nguyen Trung Thanh<sup>b</sup>,  
Bui Hanh Nhung<sup>a,b</sup>, Ong Van Hoang<sup>c,a</sup>, Ta Ngoc Bach<sup>d</sup>, Nguyen Quang Hoa<sup>e</sup>,  
Anh-Tuan Pham<sup>a,f</sup>, Anh-Tuan Le<sup>a,b,\*\*</sup>

<sup>a</sup>Phenikaa University Nano Institute (PHENA), Phenikaa University, Hanoi 12116, Vietnam

<sup>b</sup>Faculty of Materials Science and Engineering, Phenikaa University, Hanoi 12116, Vietnam

<sup>c</sup>University of Transport Technology, Trieu Khuc, Thanh Xuan District, Hanoi, Viet Nam

<sup>d</sup>Institute of Materials Science (IMS), Vietnam Academy of Science and Technology,  
18 Hoang Quoc Viet, Hanoi 10000, Vietnam

<sup>e</sup>Faculty of Physics, VNU University of Science, Vietnam National University, Hanoi,  
Thanh Xuan, Hanoi, Vietnam

<sup>f</sup>Faculty of Biotechnology, Chemistry and Environmental Engineering, Hanoi 12116, Vietnam

Corresponding authors:

\*[doan.maiquan@phenikaa-uni.edu.vn](mailto:doan.maiquan@phenikaa-uni.edu.vn) (Q.D. Mai)

\*\*[tuan.leanh@phenikaa-uni.edu.vn](mailto:tuan.leanh@phenikaa-uni.edu.vn) (A.T. Le)

<sup>1</sup> Q.D. Mai and D.T.H. Trang contributed equally to this work

### Calculation of limit of detection (LOD)

The standard curve of linear detecting range was given as:

$$Y = A + B \times \text{Log}(X) \quad (1)$$

where A and B are intercept and slope of regression equation obtained through the plot of the logarithmic SERS intensity (Y) – logarithmic concentration (X).

The LOD is calculated using the following equation(1):

$$LOD = 10^{\frac{(Y_{blank} + 3SD) - A}{B}} \quad (2)$$

where  $Y_{blank}$  and SD are the SERS signal and the standard deviation of blank sample, respectively.

SD is calculated via the well-known formula:

$$SD = \sqrt{\frac{1}{n-1} \times \sum_i^n (x_i - x_{average})^2} \quad (3)$$

where  $x_i$  if the “i” sample of the series of measurements,  $x_{average}$  is the average value of SERS signal obtained from the blank sample repeated n times.

### Calculation of enhancement factor (EF)

The EF value is calculated according to the well-established equation, which was employed in several published studies(2, 3):

$$EF = \frac{I_{SERS}}{I_{Raman}} \times \frac{N_{bulk}}{N_{surface}} \quad (4)$$

where  $I_{\text{Raman}}$  is the Raman signal intensity of the  $1020 \text{ cm}^{-1}$  peak of the urea collected directly from the powder sample (the result is presented in Figure S5);  $I_{\text{SERS}}$  is the SERS intensity of the  $1010 \text{ cm}^{-1}$  peak of urea on the SERS substrate based on Ag NPs and  $\text{Fe}_3\text{O}_4@\text{C}@\text{Ag}$ ; and  $N_{\text{bulk}}$  is the number of analyte molecules that are probed on the Raman spectrum of urea powder, while  $N_{\text{surface}}$  is the number of analyte molecules probed using SERS.

$N_{\text{bulk}}$  can be calculated following:

$$N_{\text{bulk}} = \frac{A_{\text{laser}} \times h \times \rho}{M} \times N_A$$

(5)

where  $A_{\text{laser}}$ ,  $h$ ,  $\rho$  and  $m$  are the laser spot area, the focal length, the density of the solid analyte and its molecular weight, respectively; and  $N_A$  is the Avogadro number.

$N_{\text{surface}}$  can be expressed as:

$$N_{\text{surface}} = \frac{C \times V}{A_{\text{substrate}}} \times N_A \times A_{\text{laser}} \quad (6)$$

where  $C$ ,  $V$ ,  $A_{\text{substrate}}$  are the concentration, the volume drop-casted of the analyte, and the area of the substrate, respectively;  $N_A$  is the Avogadro number; and  $A_{\text{laser}}$  is the laser spot area.

Thus EF can be calculated as:

$$EF = \frac{I_{\text{SERS}}}{I_{\text{Raman}}} \times \frac{N_{\text{bulk}}}{N_{\text{surface}}} = \frac{I_{\text{SERS}}}{I_{\text{Raman}}} \times \frac{h \times \rho \times A_{\text{substrate}}}{M \times C \times V}$$

(7)

In our case,  $I_{\text{Raman}}$  value is determined by the intensity of the peak at  $1020 \text{ cm}^{-1}$  in the Raman spectrum of urea in its powdered form,  $I_{\text{SERS}}$  value is obtained from the intensity of the peak at

1010  $\text{cm}^{-1}$  in the SERS spectrum of urea at a concentration of  $10^{-8}$  M for  $\text{Fe}_3\text{O}_4@\text{C}@\text{Ag}$  substrate and  $10^{-4}$  M for Ag NP substrate,  $h = 2 \mu\text{m}$ ,  $\rho_{\text{urea}} = 1.32 \text{ g/cm}^3$ ;  $M_{\text{urea}} = 60 \text{ g/mol}$ ;  $A_{\text{substrate}} = 4 \text{ mm}^2$ ,  $V = 5 \mu\text{L}$ .

### Calculation of relative standard deviation (RSD)

The RSD value of repeatability and reproducibility is calculated via the well-known formula:

$$\text{RSD} = \frac{SD \times 100}{x_{\text{average}}} \quad (8)$$

where SD is the standard deviation that calculates using equation 3 and  $x_{\text{average}}$  is the average value of SERS signal obtained from each measurement.

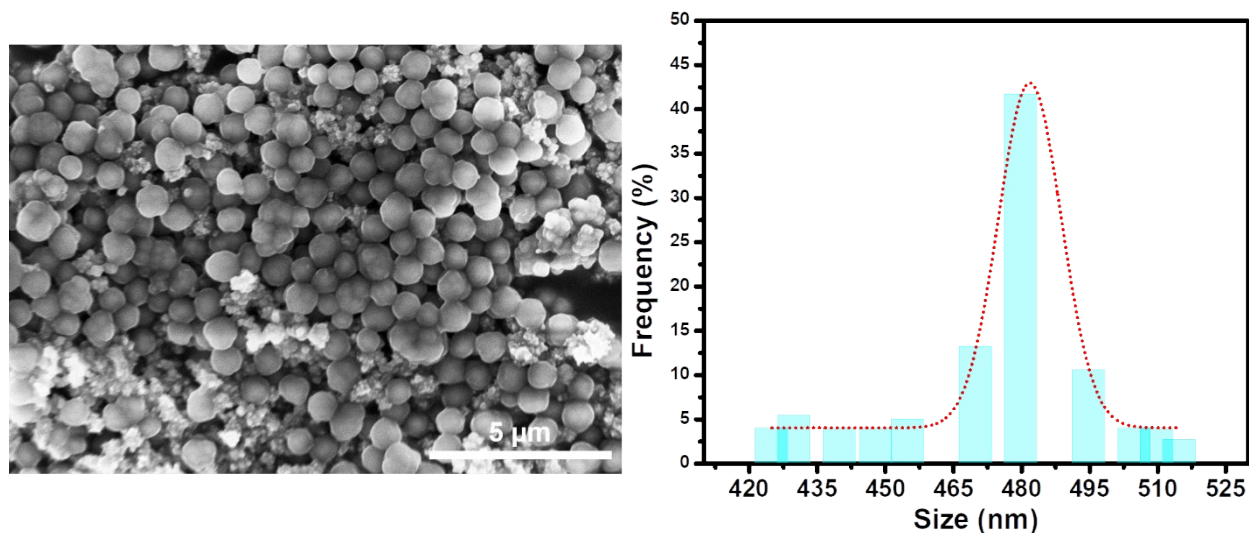

Figure S1. FE-SEM images and the size distribution of  $\text{Fe}_3\text{O}_4@\text{C}$  materials.

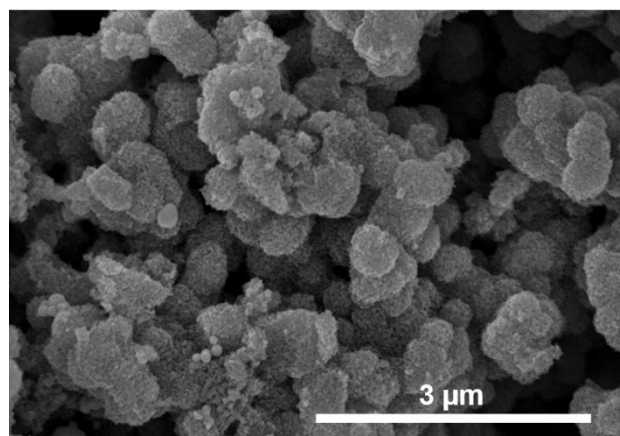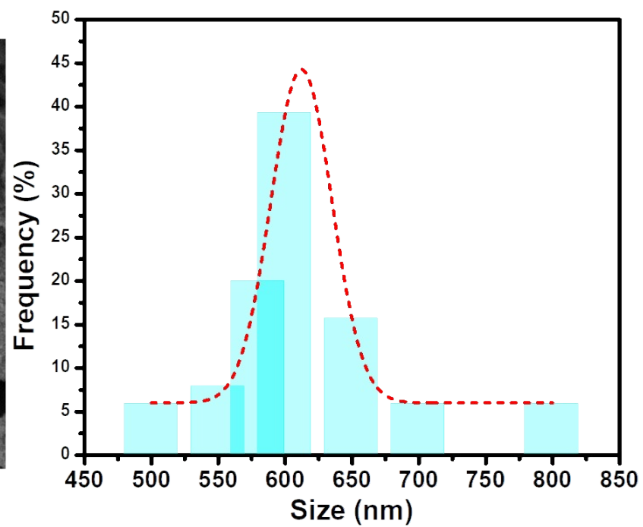

Figure S2. FE-SEM images and the size distribution of  $\text{Fe}_3\text{O}_4@\text{C}@\text{Ag}$  materials.

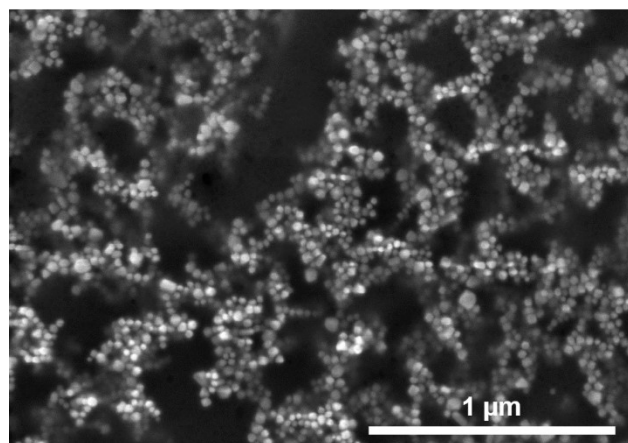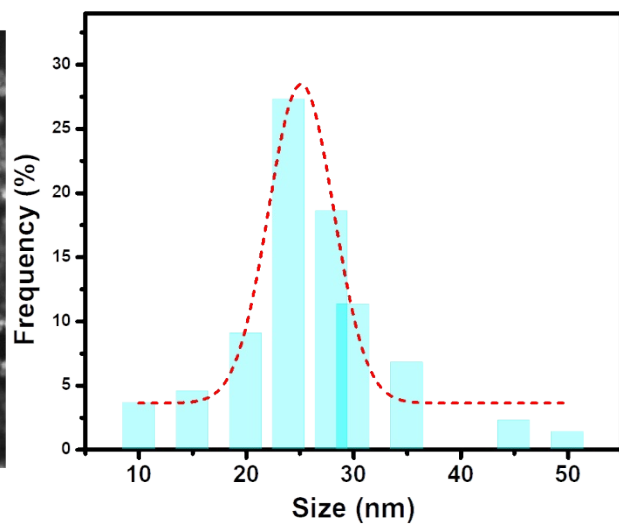

Figure S3. FE-SEM images and the size distribution of Ag nanoparticles.

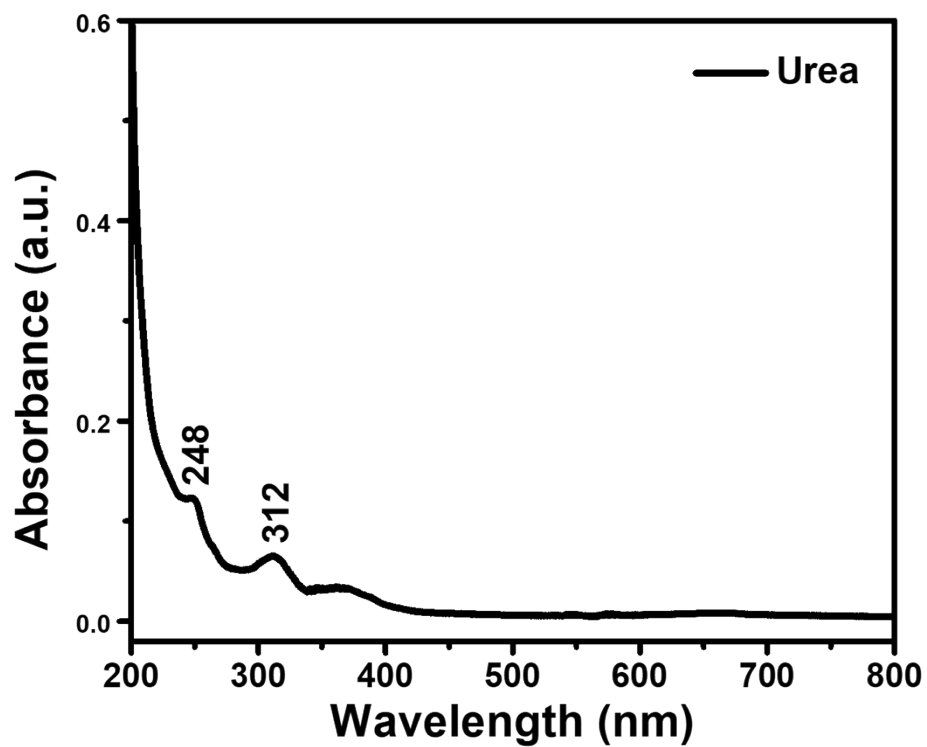

Figure S4. UV-Vis spectrum of urea at a concentration of  $10^{-4}$  M.

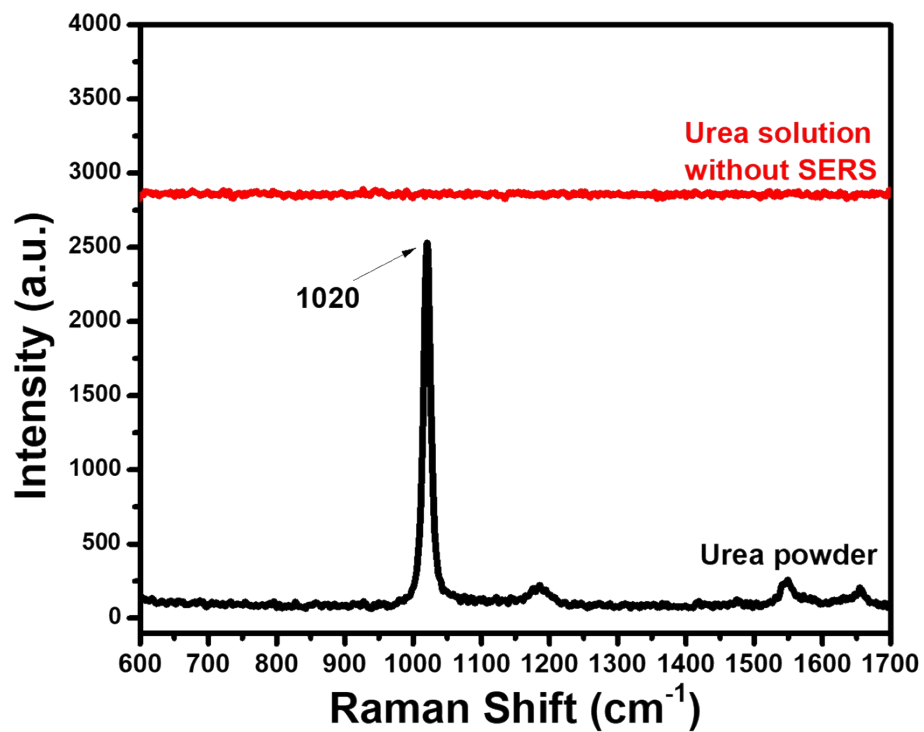

Figure S5. Raman spectra of urea powder and urea solution at a concentration of  $10^{-3}$  M on the aluminum substrate in the absence of SERS material.

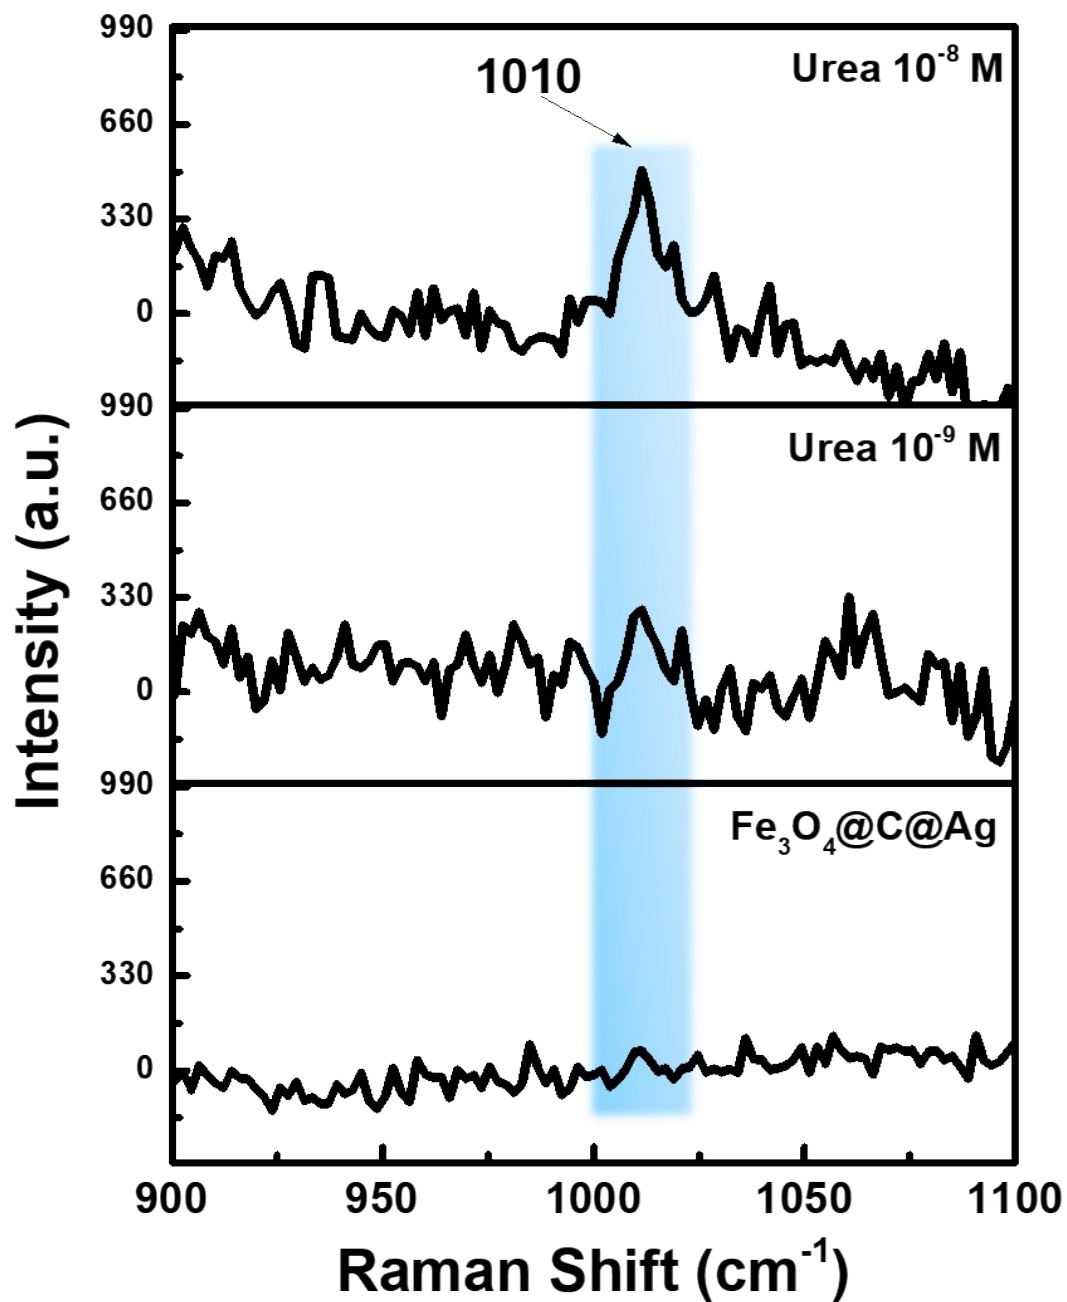

Figure S6. The Raman spectrum of the bare Fe<sub>3</sub>O<sub>4</sub>@C@Ag substrate and the SERS spectra of urea at concentrations of  $10^{-8}$  M and  $10^{-9}$  M.

## References

1. Chen R, Shi H, Meng X, Su Y, Wang H, He Y. Dual-amplification strategy-based SERS chip for sensitive and reproducible detection of DNA methyltransferase activity in human serum. *Analytical chemistry*. 2019;91(5):3597-3603.
2. Le Ru EC, Blackie E, Meyer M, Etchegoin PG. Surface enhanced Raman scattering enhancement factors: a comprehensive study. *The Journal of Physical Chemistry C*. 2007;111(37):13794-13803.
3. Fu WL, Zhen SJ, Huang CZ. One-pot green synthesis of graphene oxide/gold nanocomposites as SERS substrates for malachite green detection. *Analyst*. 2013;138(10):3075-3081.
